# Supplementary material
Source: publisher site journal article supplement (https://www.dovepress.com/article/576901)
Supplement: Supplementary file 1 [file Supplementary%20Table%20S1_1.docx]

Supplementary Table S1: Details of instrumental variable SNPs for the causal association between BCL2A1 and rheumatoid arthritis

| SNP | rs10509186 | rs111696008 | rs1355538 | rs17580 | rs28919269 | rs6993770 |
| --- | --- | --- | --- | --- | --- | --- |
| effect_allele.exposure | T | A | G | A | G | T |
| other_allele.exposure | C | G | A | T | C | A |
| effect_allele.outcome | T | A | G | A | G | T |
| other_allele.outcome | C | G | A | T | C | A |
| beta.exposure | 0.0574 | -0.1505 | -0.0966 | 0.1427 | 0.047 | -0.0588 |
| beta.outcome | 0.023424 | -0.142581 | -0.0108012 | 0.148596 | 0.01381 | -0.0217515 |
| eaf.exposure | 0.48106 | 0.02443 | 0.39847 | 0.03316 | 0.3179 | 0.22448 |
| eaf.outcome | 0.47251 | 0.0147895 | 0.672407 | 0.00921962 | 0.343404 | 0.223048 |
| remove | FALSE | FALSE | FALSE | FALSE | FALSE | FALSE |
| palindromic | FALSE | FALSE | FALSE | TRUE | TRUE | TRUE |
| ambiguous | FALSE | FALSE | FALSE | FALSE | FALSE | FALSE |
| id.outcome | lK60yI | lK60yI | lK60yI | lK60yI | lK60yI | lK60yI |
| pval.outcome | 0.200908 | 0.0697574 | 0.580063 | 0.123392 | 0.472634 | 0.32531 |
| se.outcome | 0.0183148 | 0.0786227 | 0.0195217 | 0.0964474 | 0.0192286 | 0.0221141 |
| outcome | Rheumatoid arthritis | Rheumatoid arthritis | Rheumatoid arthritis | Rheumatoid arthritis | Rheumatoid arthritis | Rheumatoid arthritis |
| mr_keep.outcome | TRUE | TRUE | TRUE | TRUE | TRUE | TRUE |
| pval_origin.outcome | reported | reported | reported | reported | reported | reported |
| data_source.outcome | textfile | textfile | textfile | textfile | textfile | textfile |
| exposure | BCL2A1 | BCL2A1 | BCL2A1 | BCL2A1 | BCL2A1 | BCL2A1 |
| chr.exposure | chr10 | chr2 | chr3 | chr14 | chr5 | chr8 |
| pos.exposure | 63447258 | 216622986 | 165787389 | 94380925 | 42804436 | 105569300 |
| se.exposure | 0.007998 | 0.026568 | 0.008146 | 0.022513 | 0.008611 | 0.009616 |
| pval.exposure | 7.126e-13 | 1.472e-08 | 1.933e-32 | 2.32e-10 | 4.817e-08 | 9.684e-10 |
| samplesize.exposure | 35351 | 35359 | 35338 | 35372 | 35358 | 35365 |
| mr_keep.exposure | TRUE | TRUE | TRUE | TRUE | TRUE | TRUE |
| pval_origin.exposure | reported | reported | reported | reported | reported | reported |
| id.exposure | n6csHv | n6csHv | n6csHv | n6csHv | n6csHv | n6csHv |
| data_source.exposure | textfile | textfile | textfile | textfile | textfile | textfile |
| action | 2 | 2 | 2 | 2 | 2 | 2 |
| SNP_index | 1 | 1 | 1 | 1 | 1 | 1 |
| mr_keep | TRUE | TRUE | TRUE | TRUE | TRUE | TRUE |
| samplesize.outcome | NA | NA | NA | NA | NA | NA |
